# Supplementary material for: Curcuminoid submicron particle ameliorates cognitive deficits and decreases amyloid pathology in Alzheimer’s disease mouse model
Source: PubMed Central journal article supplement (PMC5828200; doi:10.18632/oncotarget.24369), 2018-01-31
Supplement: oncotarget-09-10681-s001.pdf [file oncotarget-09-10681-s001.pdf]

## Curcuminoid submicron particle ameliorates cognitive deficits and decreases amyloid pathology in Alzheimer's disease mouse model

### SUPPLEMENTARY MATERIALS

**Supplementary Table 1: The impact of curcuminoid submicron particle (CSP) on micronucleation in male ICR mice in micronucleus assay**

|                                     | Dose (g/kg) | Micronucleated erythrocytes (%) |         | Micronucleated reticulocytes (%) |         |
|-------------------------------------|-------------|---------------------------------|---------|----------------------------------|---------|
|                                     |             | Mean                            | SEM     | Mean                             | SEM     |
| Negative control (Sterile water)    | 0           | 0.53                            | ± 0.14  | 1.72                             | ± 0.57  |
| Positive control (Cyclophosphamide) | 0.10        | 6.98                            | ± 2.14* | 0.20                             | ± 0.18* |
| Low dose                            | 0.03        | 0.50                            | ± 0.23  | 1.72                             | ± 0.42  |
| Moderate dose                       | 0.30        | 0.61                            | ± 0.21  | 2.41                             | ± 0.94  |
| High dose                           | 3.00        | 0.57                            | ± 0.18  | 2.27                             | ± 1.44  |

n = 5. Data are presented as mean ± SEM. Results were analyzed by two-way ANOVA (\* $p < 0.05$  vs. negative control, Dunnett's  $t$ -test, 2-sides).

**Supplementary Table 2: Mortality of each group in the 28-day and 90-day oral toxicity study of curcuminoid submicron particle (CSP)**

| Dose (g/kg/day)               | 28-day |     |     |     | 90-day |     |     |     |
|-------------------------------|--------|-----|-----|-----|--------|-----|-----|-----|
|                               | 0      | 0.1 | 0.5 | 1.0 | 0      | 0.1 | 0.5 | 1.0 |
| <b>Female</b>                 |        |     |     |     |        |     |     |     |
| Number of deaths/total number | 0/6    | 0/6 | 0/6 | 0/6 | 0/8    | 0/8 | 0/8 | 0/8 |
| Mortality rate (%)            | 0      | 0   | 0   | 0   | 0      | 0   | 0   | 0   |
| <b>Male</b>                   |        |     |     |     |        |     |     |     |
| Number of deaths/total number | 0/6    | 0/6 | 0/6 | 0/6 | 0/8    | 0/8 | 0/8 | 0/8 |
| Mortality rate (%)            | 0      | 0   | 0   | 0   | 0      | 0   | 0   | 0   |

n = 6 each group for 28-day study; n = 8 each group for 90-day study

**Supplementary Table 3: Organ weight of each group in the 28-day oral toxicity study of curcuminoid submicron particle (CSP)**

| Organ         | Average weight(g) |            |            |            |
|---------------|-------------------|------------|------------|------------|
|               | dose (g/kg/day)   |            |            |            |
|               | 0                 | 0.1        | 0.5        | 1.0        |
| <b>Female</b> |                   |            |            |            |
| Liver         | 8.04±0.60         | 7.85±1.00  | 8.45±0.55  | 8.51±0.77  |
| Spleen        | 0.53±0.07         | 0.55±0.06  | 0.56±0.04  | 0.48±0.05  |
| Kidney        | 1.73±0.11         | 1.81±0.21  | 1.86±0.07  | 1.72±0.09  |
| Adrenal gland | 0.07±0.01         | 0.08±0.02  | 0.07±0.01  | 0.07±0.02  |
| ovary         | 0.14±0.02         | 0.14±0.01  | 0.15±0.02  | 0.17±0.02* |
| <b>Male</b>   |                   |            |            |            |
| Liver         | 11.25±1.77        | 11.72±2.43 | 12.32±1.96 | 10.96±1.02 |
| Spleen        | 0.67±0.15         | 0.67±0.08  | 0.79±0.13  | 0.63±0.10  |
| Kidney        | 2.80±0.41         | 2.79±0.45  | 2.92±0.25  | 2.52±0.13  |
| Adrenal gland | 0.06±0.01         | 0.06±0.02  | 0.07±0.02  | 0.06±0.01  |
| Testis        | 3.03±0.20         | 2.91±0.12  | 3.11±0.26  | 2.76±0.56  |

n = 6. Data are presented as mean ± SEM. Results were analyzed by two-way ANOVA (\*,  $p < 0.05$  vs. 0 g/kg/day control, Dunnett's *t*-test, 2-sides).

**Supplementary Table 4: Organ weight of each group in the 90-day oral toxicity study of curcuminoid submicron particle (CSP)**

| Organs        | Average weight(g)  |            |            |            |
|---------------|--------------------|------------|------------|------------|
|               | dose (g/kg bw/day) |            |            |            |
|               | 0                  | 0.1        | 0.5        | 1.0        |
| <b>Female</b> |                    |            |            |            |
| Brain         | 1.92±0.03          | 1.91±0.05  | 1.86±0.08  | 1.86±0.05  |
| Thymus        | 0.37±0.04          | 0.30±0.02  | 0.31±0.02  | 0.33±0.05  |
| Liver         | 6.96±0.25          | 7.31±0.28  | 7.46±0.34  | 7.04±0.35  |
| Spleen        | 0.50±0.02          | 0.49±0.06  | 0.53±0.03  | 0.47±0.03  |
| Kidney        | 1.65±0.07          | 1.73±0.05  | 1.53±0.04  | 1.51±0.04  |
| Adrenal gland | 0.07±0.01          | 0.07±0.01  | 0.06±0.01  | 0.05±0.01  |
| Ovary         | 0.11±0.01          | 0.11±0.01  | 0.13±0.01  | 0.12±0.01  |
| <b>Male</b>   |                    |            |            |            |
| Brain         | 1.98±0.06          | 1.92±0.06  | 1.99±0.05  | 1.82±0.04  |
| Thymus        | 0.42±0.05          | 0.46±0.03  | 0.40±0.05  | 0.40±0.03  |
| Liver         | 12.40±0.38         | 13.54±0.73 | 14.26±0.72 | 12.54±0.62 |
| Spleen        | 0.78±0.02          | 0.79±0.03  | 0.83±0.05  | 0.77±0.02  |
| Kidney        | 2.91±0.07          | 2.92±0.17  | 3.11±0.09  | 3.17±0.20  |
| Adrenal gland | 0.06±0.01          | 0.06±0.01  | 0.07±0.01  | 0.06±0.01  |
| Testis        | 3.49±0.06          | 3.40±0.11  | 3.45±0.15  | 3.21±0.34  |

n = 8. Data are presented as mean ± SEM. Results were analyzed by two-way ANOVA ( $p > 0.05$ , Dunnett's *t*-test, 2-sides).
